# Supplementary figures and images for: A role for the immunological synapse in lineage commitment of CD4 lymphocytes
Source: Springer Nature journal article supplement (doi:10.1038/nature02916), 2004-09-01

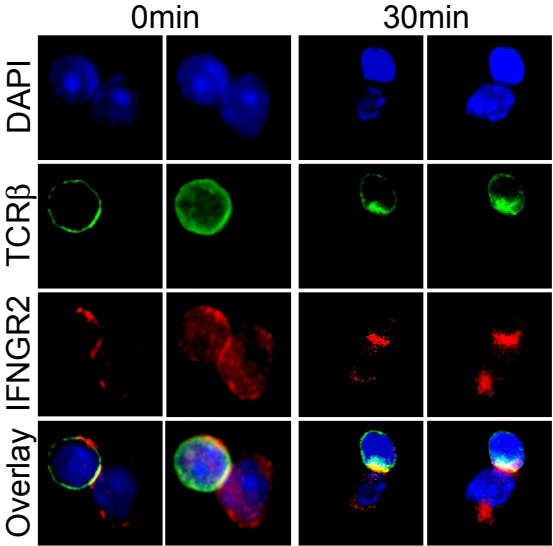

Supplement: 41586_2004_BFnature02916_MOESM1_ESM.pdf [file 41586_2004_BFnature02916_MOESM1_ESM.pdf]

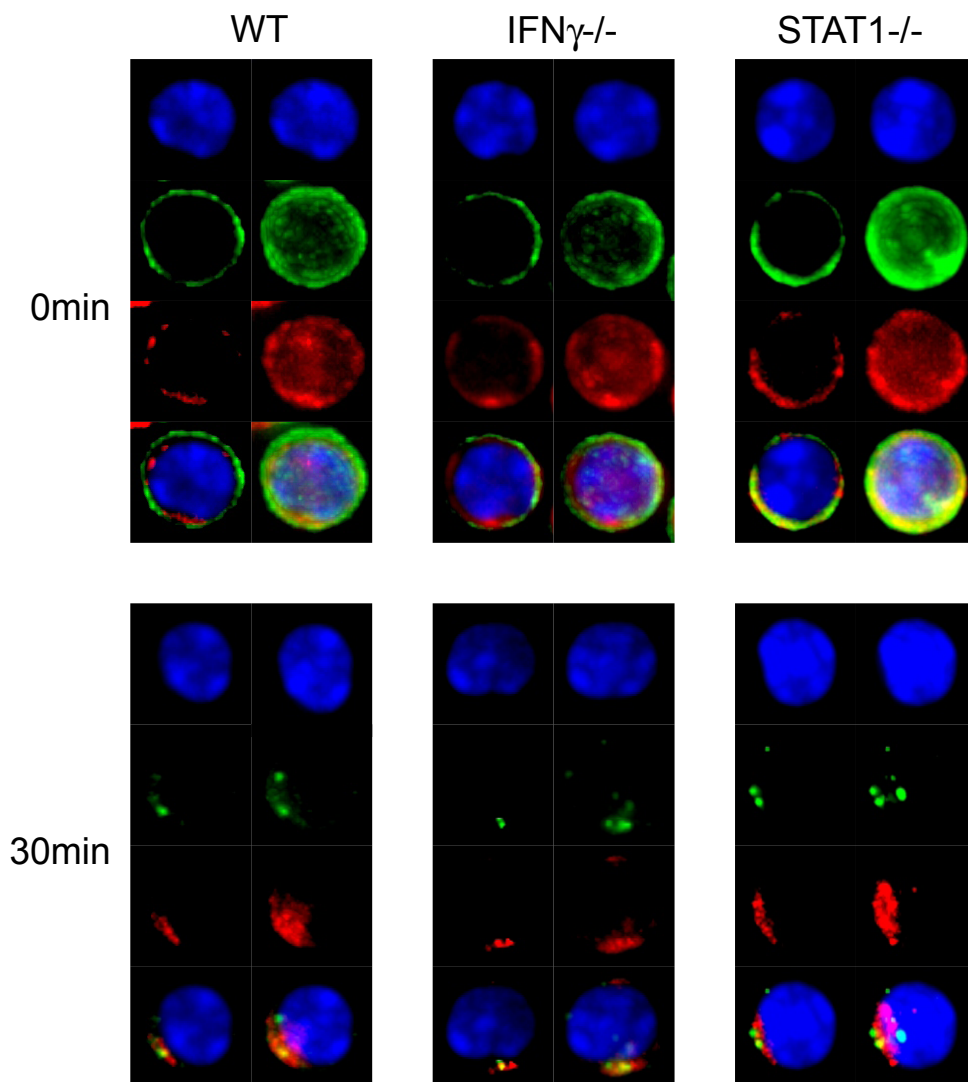

Supplement: 41586_2004_BFnature02916_MOESM2_ESM.pdf [file 41586_2004_BFnature02916_MOESM2_ESM.pdf]

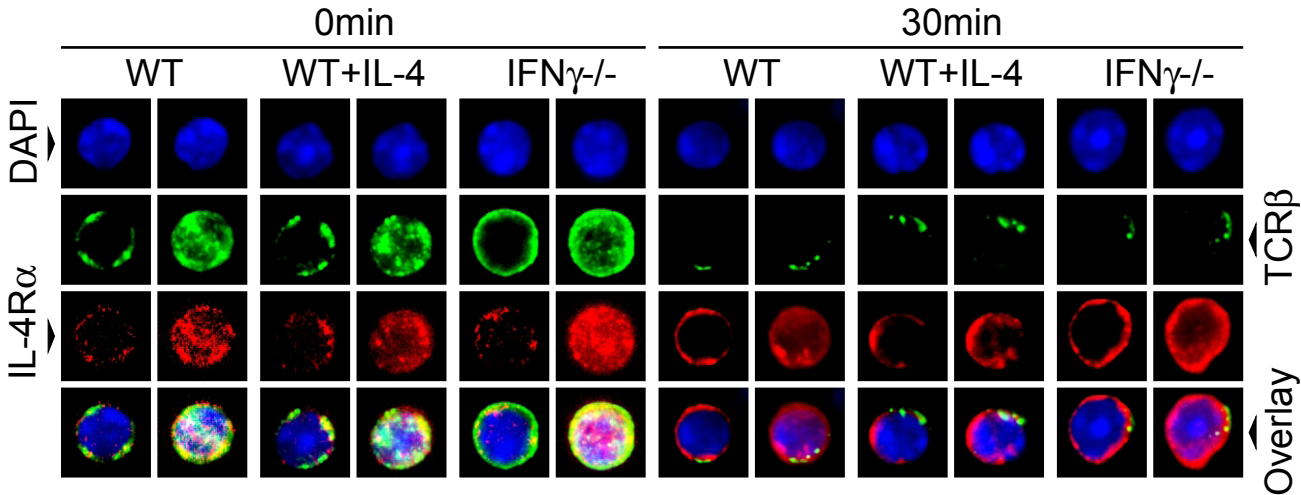

Supplement: 41586_2004_BFnature02916_MOESM3_ESM.pdf [file 41586_2004_BFnature02916_MOESM3_ESM.pdf]

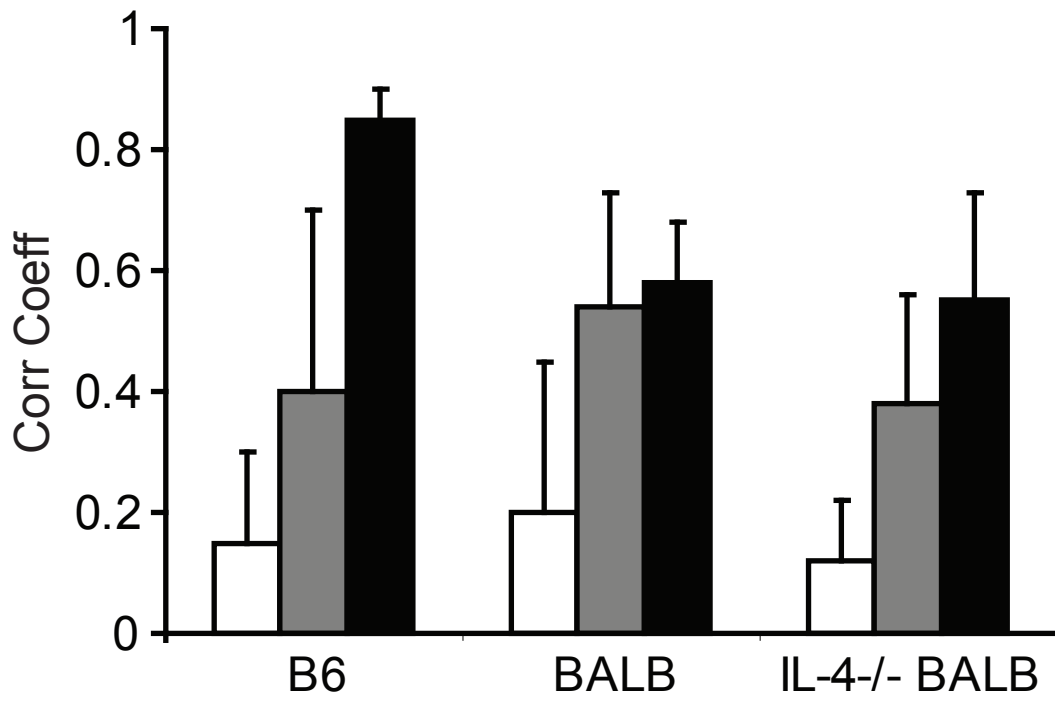

Supplement: 41586_2004_BFnature02916_MOESM4_ESM.pdf [file 41586_2004_BFnature02916_MOESM4_ESM.pdf]
